# Supplementary material for: The underappreciated role of agricultural soil nitrogen oxide emissions in ozone pollution regulation in North China
Source: PubMed Central journal article supplement (PMC8373933; doi:10.1038/s41467-021-25147-9), 2021-08-18
Supplement: 41467_2021_25147_MOESM1_ESM.pdf [file 41467_2021_25147_MOESM1_ESM.pdf]

# Supplementary information

## The underappreciated role of agricultural soil nitrogen oxide emissions in ozone pollution regulation in North China

Xiao Lu<sup>1,2</sup>, Xingpei Ye<sup>1</sup>, Mi Zhou<sup>1</sup>, Yuanhong Zhao<sup>3</sup>, Hongjian Weng<sup>1</sup>, Hao Kong<sup>1</sup>, Ke Li<sup>4</sup>, Meng Gao<sup>5</sup>, Bo Zheng<sup>6</sup>, Jintai Lin<sup>1</sup>, Feng Zhou<sup>7</sup>, Qiang Zhang<sup>8</sup>, Dianming Wu<sup>9</sup>, Lin Zhang<sup>1\*</sup>, Yuanhang Zhang<sup>10\*</sup>

<sup>1</sup> Laboratory for Climate and Ocean-Atmosphere Studies, Department of Atmospheric and Oceanic Sciences, School of Physics, Peking University, Beijing 100871, China

<sup>2</sup> School of Atmospheric Sciences, Sun Yat-sen University, Zhuhai, Guangdong 519082, China

<sup>3</sup> College of Oceanic and Atmospheric Sciences, Ocean University of China, Qingdao 266100, China

<sup>4</sup> John A. Paulson School of Engineering and Applied Sciences, Harvard University, MA 02138, United States

<sup>5</sup> Department of Geography, Hong Kong Baptist University, Hong Kong 999077, China;

<sup>6</sup> Laboratoire des Sciences du Climat et de l'Environnement, CEA-CNRS-UVSQ, UMR8212, Gif-sur-Yvette, France

<sup>7</sup> Laboratory for Earth Surface Processes, College of Urban and Environmental Sciences, Peking University, Beijing, 100871, China

<sup>8</sup> Ministry of Education Key Laboratory for Earth System Modeling, Department of Earth System Science, Tsinghua University, Beijing, China

<sup>9</sup> Key Laboratory of Geographic Information Sciences, School of Geographic Sciences, East China Normal University, Shanghai 200241, China

<sup>10</sup> State Key Joint Laboratory of Environmental Simulation and Pollution Control, College of Environmental Sciences and Engineering, Peking University, Beijing 100871, China

### Correspondence and requests for materials should be addressed to:

L. Zhang (zhanglg@pku.edu.cn) and Y.H. Zhang (yhzhang@pku.edu.cn)

### This file includes:

Supplementary information on the Berkeley-Dalhousie Soil NO<sub>x</sub> Parameterization (BDSNP)

Supplementary Figures 1-10

Supplementary Tables 1-6

SI References

## Supplementary information on the Berkeley-Dalhousie Soil NO<sub>x</sub> Parameterization (BDSNP)

The BDSNP parameterizes global soil NO<sub>x</sub> emissions ( $Emis_{soil}$ ) as a function of available soil nitrogen content, climate and edaphic conditions following:

$$Emis_{soil} = A'_{biome}(N_{avail}) \times f(T) \times g(\theta) \times P(l_{dry}), \quad (1)$$

where  $N_{avail}$  represents available soil nitrogen mass,  $A'_{biome}$  denotes the biome-dependent emission factors,  $f(T)$  and  $g(\theta)$  are the temperature and soil moisture dependences, and  $P(l_{dry})$  describes the pulsed soil emissions from wetting of dry soils<sup>1</sup>. A number of 24 soil biomes are considered in BDSNP following Steinkamp and Lawrence (2011)<sup>2</sup>, and the model calculates the total emissions from all the biomes weighted by their relative fractions in the grid box.

The soil temperature and moisture term  $f(T)$  and  $g(\theta)$  is given as:

$$f(T) \times g(\theta) = e^{0.103T} \times a\theta e^{-b\theta^2}, \quad (2)$$

where  $T$  ( $0 \leq T \leq 30^\circ$ ) is the soil temperature and  $\theta$  ( $0 \leq \theta \leq 1$ ) is the water-filled pore space. The exponential dependence on temperature followed the Yienger and Levy (1995) scheme<sup>3</sup>, where 0.103 is the weighted average of dependence for different biomes. Soil temperature is not available directly from the GEOS-Chem meteorological fields, instead it is converted from the surface air temperature separately for dry and wet soil and for different biomes.

The term  $g(\theta)$  describes the Poisson function scaling for soil moisture.  $\theta$  is defined as the ratio of the volumetric soil moisture content to the porosity, and is normalized by dividing by the porosity so that  $0 \leq \theta \leq 1$ . It is available hourly from the GEOS-FP meteorological fields for the top 2 cm of soil, where the majority of the soil NO<sub>x</sub> release. The values of  $a$  and  $b$  are chosen such that  $g(\theta)$  maximizes when  $\theta = 0.2$  for arid soils and  $\theta = 0.3$  elsewhere according to laboratory and field measurements. As point out by Hudman et al. (2012)<sup>1</sup>, there is uncertainty on how well  $\theta$  can reflect the real-world water-filled pore space, but its use represents a mechanistic approach for soil NO<sub>x</sub> emission estimates in the atmospheric chemical model that can take advantage of available assimilated meteorological fields.

The pulsing term  $P(l_{dry})$  describes the pulsing of soil NO<sub>x</sub> emissions from a reactivation of water-stressed bacteria when very dry soil is wetted due to irrigation and/or rainfalls. It follows Yan et al. (2005)<sup>4</sup> and is given as:

$$P(l_{dry}) = [13.01 \ln(l_{dry}) - 53.6] \times e^{-ct}, \quad (3)$$

where  $l_{dry}$  is the length of the antecedent dry period in hours which is updated in the model based on soil moisture from the meteorological fields,  $c = 0.068 \text{ hour}^{-1}$  is a constant rate denoting the rise/fall time of the pulse, and  $t$  is the model emission time step.

The BDSNP considers available soil nitrogen content from the natural pool, fertilizer

76 application, and nitrogen deposition. Fertilizer applications are obtained from the global  
 77 gridded chemical fertilizer and manure application inventory at  $0.5^\circ \times 0.5^\circ$ , in which the  
 78 chemical fertilizers were spatially disaggregated from the International Fertilizer Association  
 79 (IFA) national totals for year 2000 conditions, and the manure fertilizer were obtained from the  
 80 Food and Agriculture Organization of the United Nations (FAO) Gridded Livestock of the  
 81 World (GLW) project. We find that the Chinese chemical fertilizer application (straight N  
 82 application) from IFA as used in this study gives  $19.6 \text{ Tg N a}^{-1}$  for 2000, which is close to the  
 83 estimate of  $22.2 \text{ Tg N a}^{-1}$  for 2017 from the China Statistical Yearbook  
 84 (<http://www.stats.gov.cn/tjsj/ndsj/>). The China Statistical Yearbook estimates relatively stable  
 85 Chinese chemical fertilizer application of about 21-24  $\text{Tg N a}^{-1}$  in 2000-2017. The uncertainties  
 86 in the fertilizer input can be considered in our sensitivity simulations with different soil  $\text{NO}_x$   
 87 scenarios.

88  
 89 The annual fertilizer applications are then distributed over the satellite-derived growing season  
 90 at each grid, with 75% of which are distributed over the first month as a Gaussian distribution  
 91 around the green-up day, and the rest 25% are distributed evenly over the remaining growing  
 92 season. Multiple cropping or crop rotations are not considered here. The time-dependent  $N_{avail}$   
 93 from fertilizer application is then calculated following the mass-balance equation:

$$94 \quad N_{avail}(t) = N_{avail}(0)e^{-t/\tau} + F \times \tau \times (1 - e^{-t/\tau}), \quad (4)$$

95 where  $N_{avail}(0)$  is the initial state available in Hudman et al. (2012)<sup>1</sup>,  $t$  is the time,  $\tau$  is a  
 96 decay lifetime of 4 months for fertilizer nitrogen,  $F$  is the fertilizer application rate that varies  
 97 across the growing seasons as described above. We note here that daily  $N_{avail}$  from fertilizer  
 98 application is pre-calculated following the method introduced above and is a standard input for  
 99 BDSNP in GEOS-Chem.

100  
 101 The  $N_{avail}$  from dry and wet nitrogen deposition takes the advantages of the on-line  
 102 deposition diagnostics in GEOS-Chem for each time step and is thus coupled to the model  
 103 chemistry and deposition of reactive nitrogen compounds. BDSNP assumes 60% of deposited  
 104 nitrogen enters the soil while the remainder is lost to runoff into waterways.  $N_{avail}(t)$  from  
 105 deposition is then calculated following Eq. 4, where the decay constant  $\tau$  is chosen to be 6  
 106 months based on measurements<sup>1</sup>.

107  
 108 The biome emission factor  $A'_{biome}(N_{avail})$  then measures the available nitrogen in soils  
 109 (natural pools) and incorporates those from fertilizer and deposition.  $A'_{biome}(N_{avail})$  is  
 110 calculated as a function of  $A_{w,biome}$  and  $N_{avail}$ :

$$111 \quad A'_{biome}(N_{avail}) = A_{w,biome} + N_{avail} \times \bar{E}, \quad (5)$$

112 where  $A_{w,biome}$  is the wet biome-dependent emission factors from Steinkamp and Lawrence  
 113 (2011)<sup>2</sup> which were derived from measurements,  $N_{avail}$  is the available nitrogen from the sum

114 of fertilizer application and nitrogen deposition as described above,  $\bar{E}$  is the emission rate and  
115 is scaled in BDSNP so that the total global above-soil NO<sub>x</sub> emissions from fertilizer matches  
116 the observed estimates of 1.8 Tg N yr<sup>-1</sup> from Stehfest and Bouwman (2006)<sup>6</sup>.

117

118 The above descriptions summarize how BDSNP implemented in GEOS-Chem calculates global  
119 soil NO<sub>x</sub> emissions above soil at each model grid and time step as a function of available  
120 nitrogen content and meteorological conditions. Soil NO<sub>x</sub> emissions above canopy  
121 ( $Emis_{soil\_above\_canopy}$ ) is then calculated as:

122 
$$Emis_{soil\_above\_canopy} = Emis_{soil} \times (1 - CRF), (6)$$

123 where CRF represents the canopy reduction factor that accounts for the fraction of the emitted  
124 soil NO<sub>x</sub> lost by deposition to vegetation during transport from the soil to canopy top as  
125 described in Wang et al. (1998)<sup>7</sup>.

126



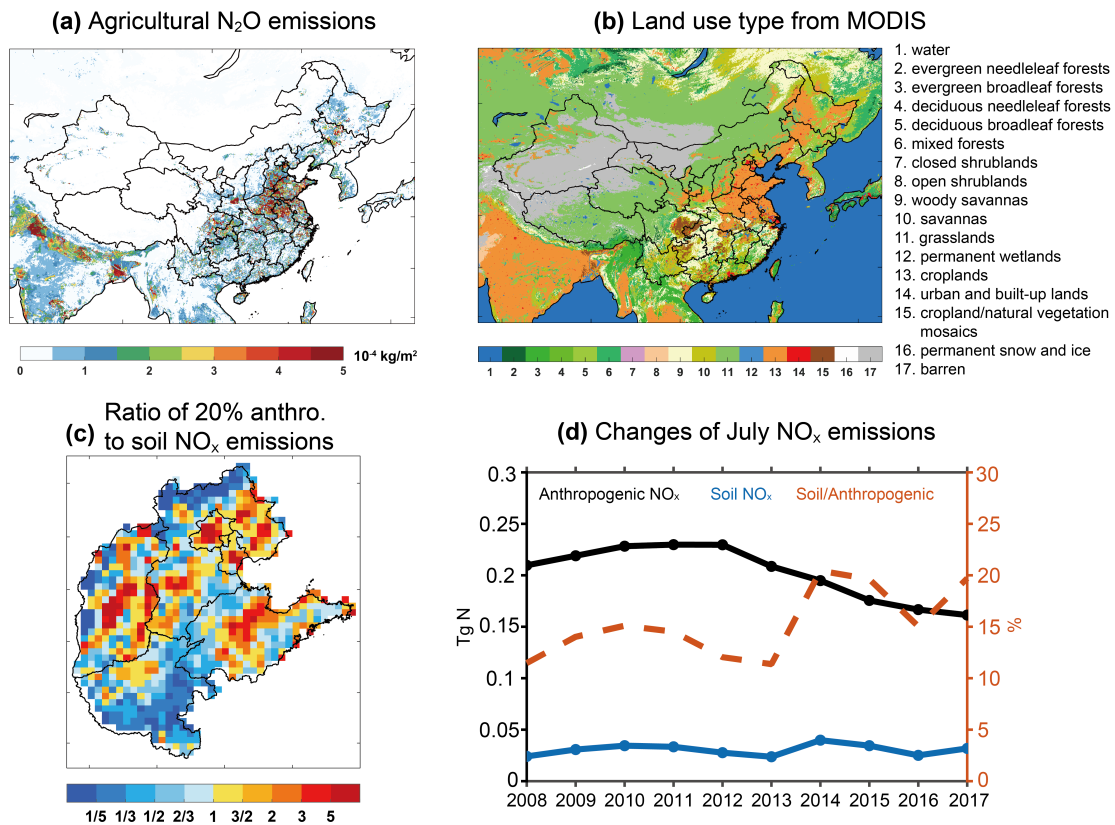

127  
 128  
 129  
 130  
 131  
 132  
 133  
 134  
 135  
 136  
 137  
 138  
 139  
 140  
 141  
 142

**Supplementary Figure 1. Evidence of substantial soil NO<sub>x</sub> emissions over the North China Plain (NCP).** (a) Agriculture N<sub>2</sub>O emissions averaged for 2010-2014 from croplands<sup>8</sup>. (b) Land use type in July 2017 from the Terra and Aqua combined Moderate Resolution Imaging Spectroradiometer (MODIS) Land Cover Climate Modeling Grid (CMG) (MCD12C1) Version 6 data (<https://lpdaac.usgs.gov/products/mcd12c1v006/>). (c) Ratio of 20% anthropogenic to soil NO<sub>x</sub> emissions over the NCP. Grids with the ratio greater than 2 are defined as high anthropogenic NO<sub>x</sub> emission model grids (accounting for 20% of the NCP grids), while grids with the ratio smaller than 0.5 are defined as high soil NO<sub>x</sub> emission model grids (accounting for 30% of the NCP grids). We use the emission ratio of 20% as the criteria here as the July soil NO<sub>x</sub> emissions in the NCP are about 20% of the anthropogenic NO<sub>x</sub> emissions (Figs 1a and 1b). (d) Time series of the total anthropogenic (black solid line) and soil NO<sub>x</sub> emissions (blue solid line) in the NCP in July 2008-2017. Also shown is the ratio of soil to anthropogenic NO<sub>x</sub> emissions (red dash line).

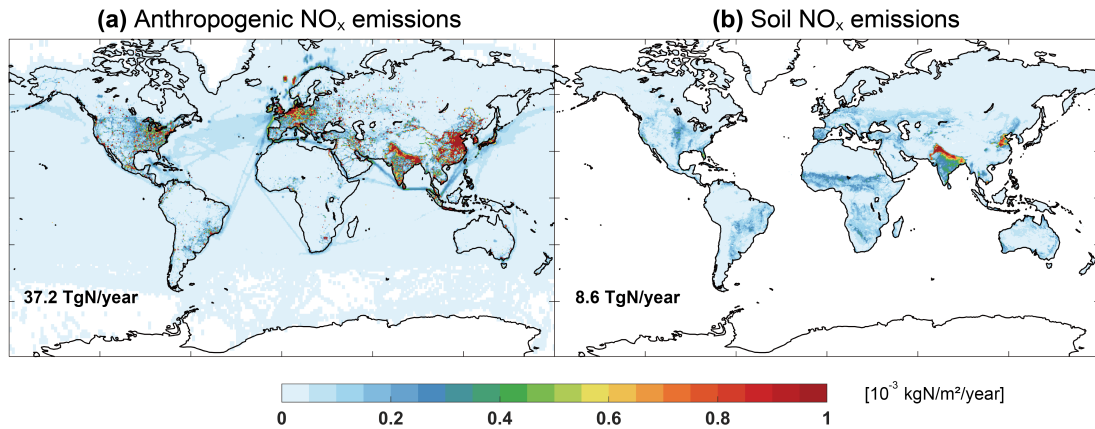

143

144 **Supplementary Figure 2. Global annual (a) anthropogenic and (b) soil NO<sub>x</sub> emissions**  
 145 **averaged for 2015-2017.** Anthropogenic emissions are from the CEDS<sub>GBD-MAPS</sub> emission  
 146 inventory<sup>9</sup>. Global soil NO<sub>x</sub> emissions are calculated using the Berkeley-Dalhousie Soil NO<sub>x</sub>  
 147 Parameterization (BDSNP) archived in Weng et al. (2020)<sup>10</sup>.

148

149

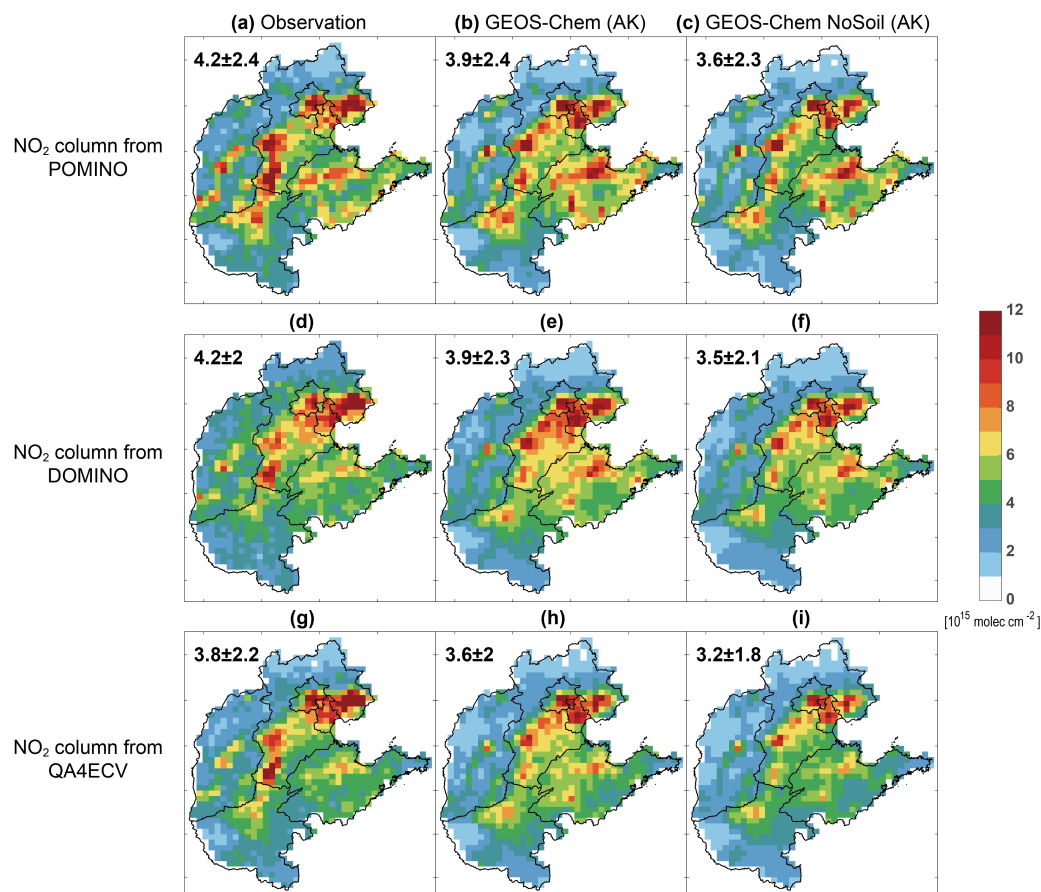

150

151 **Supplementary Figure 3. Tropospheric NO<sub>2</sub> columns over the NCP from satellite products**  
 152 **and GEOS-Chem simulations.** Panels (a), (d), and (g) show the spatial pattern of tropospheric  
 153 NO<sub>2</sub> columns from the POMINO, DOMINO, and QA4ECV products, respectively. Panels (b),  
 154 (e), and (h) show the results from the GEOS-Chem BASE model simulation with corresponding  
 155 averaging kernels applied. Panels (c), (f), and (i) are the same as panels (b), (e), and (h) but  
 156 from the GEOS-Chem NoSoil simulation (soil NO<sub>x</sub> emissions are excluded from BASE). Mean  
 157 values ± standard deviations are shown in the inset.

158

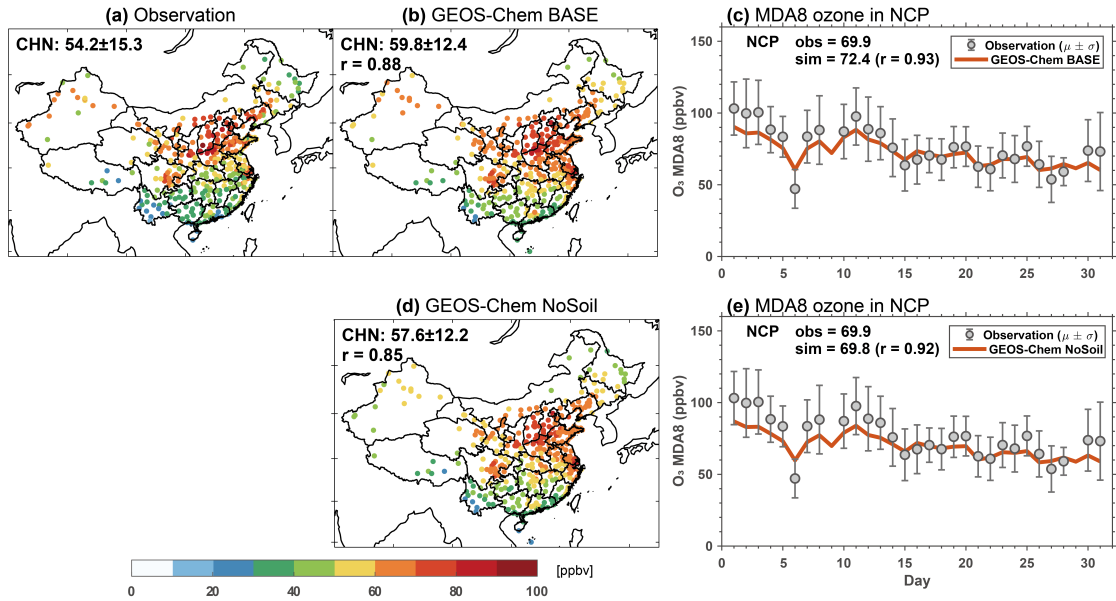

159

160 **Supplementary Figure 4. Evaluation of the GEOS-Chem simulated surface daily**  
 161 **maximum 8-h average (MDA8) ozone levels in Chinese urban sites in July 2017.** Panel (a)  
 162 and (b) show the spatial distribution of (a) observed and (b) simulated mean MDA8 ozone at  
 163 1633 Chinese urban sites. Mean values and their correlation coefficients ( $r$ ) are shown in the  
 164 inset. Panel (c) compares the time series of observed (grey circles, with bars representing the  
 165 standard deviation) and modeled ozone (red lines) averaged in the 55 NCP cities, with the  
 166 temporal correlation coefficients ( $r$ ) shown in the inset. Panels (d) and (e) are the same as Panels  
 167 (b) and (c), but from the GEOS-Chem NoSoil simulation.

168

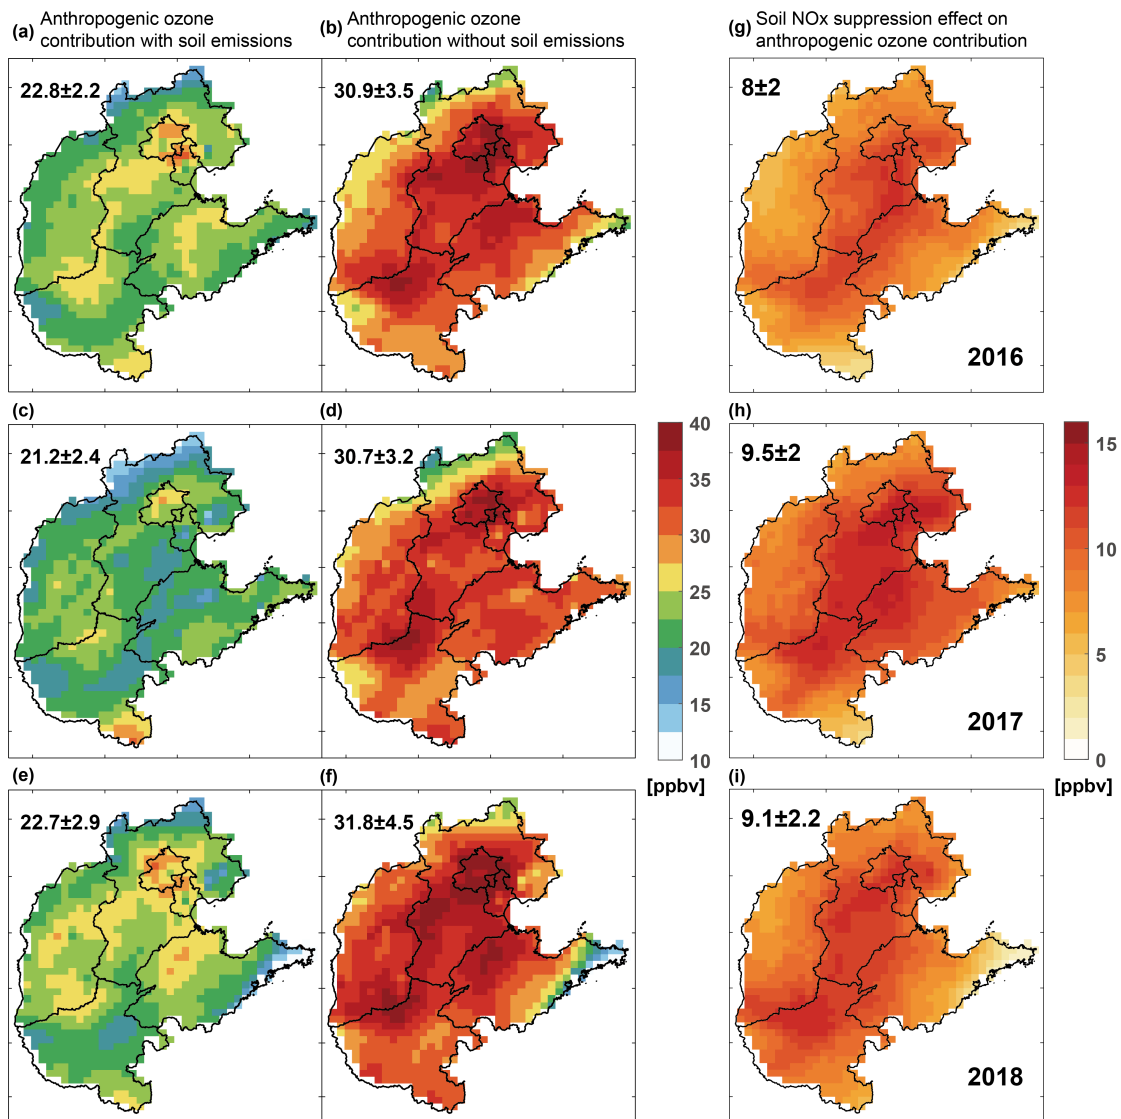

169  
 170  
 171  
 172  
 173  
 174  
 175  
 176

**Supplementary Figure 5. Soil NO<sub>x</sub> emission influences on estimated anthropogenic ozone contribution.** Panels (a) and (b), (c) and (d), and (e) and (f) are the same as Figure 2 (c) and (d) but for July 2016, 2017, and 2018, respectively. Panels (g)-(i) show the difference in the estimated anthropogenic ozone contribution in the presence/absence of the soil NO<sub>x</sub> emissions for individual years.

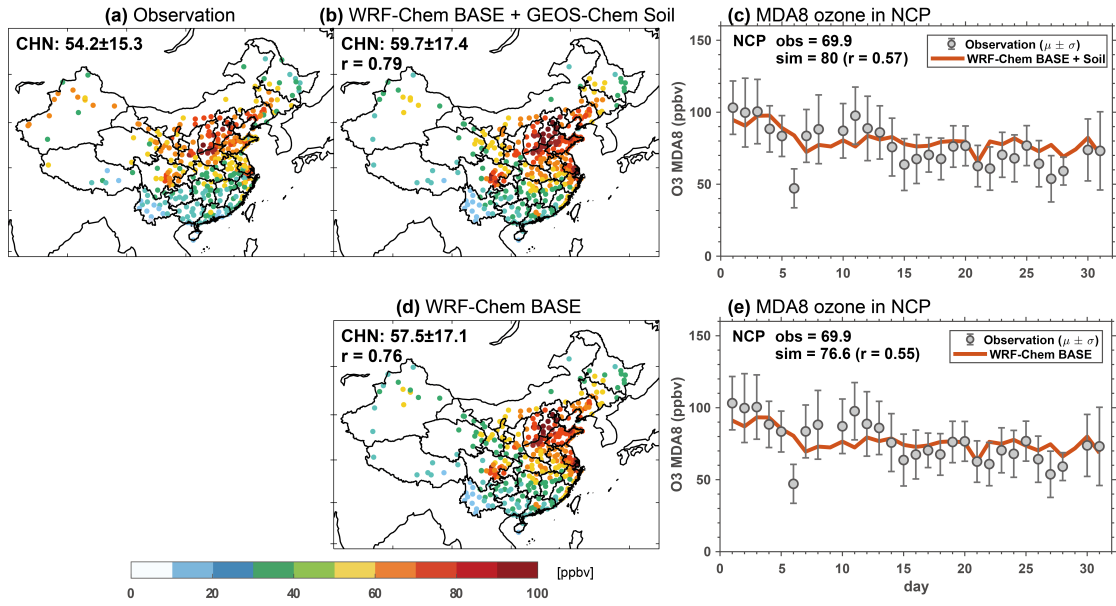

177

178

179

**Supplementary Figure 6.** Same as Figure S4, but for the WRF-Chem model.

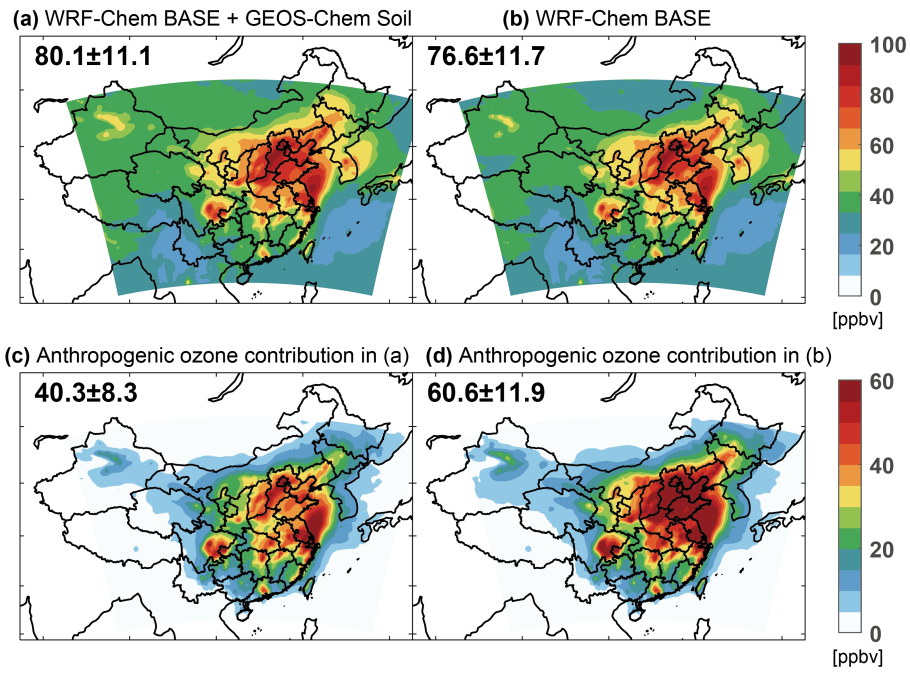

180  
 181  
 182  
 183  
 184  
 185  
 186

**Supplementary Figure 7. Soil NO<sub>x</sub> emissions influence the estimated anthropogenic ozone contribution in the WRF-Chem model.** Panels (a) and (b) show the WRF-Chem simulated MDA8 ozone with GEOS-Chem soil NO<sub>x</sub> emissions applied and excluded, respectively. Panels (c) and (d) compare the anthropogenic ozone contributions in the WRF-Chem model in the presence and absence of soil NO<sub>x</sub> emissions.

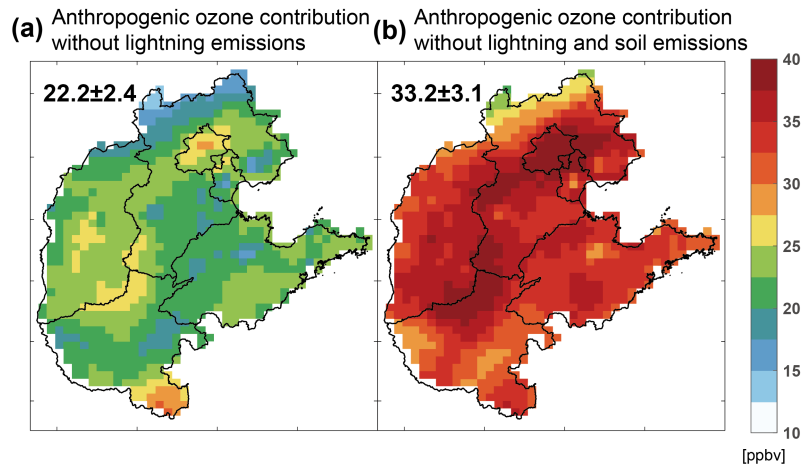

187

188 **Supplementary Figure 8.** Same as Figure 2 (c) and (d), but for anthropogenic ozone  
 189 contributions in the absence of (a) lightning emissions and (b) both lightning and soil  
 190 emissions.

191

192



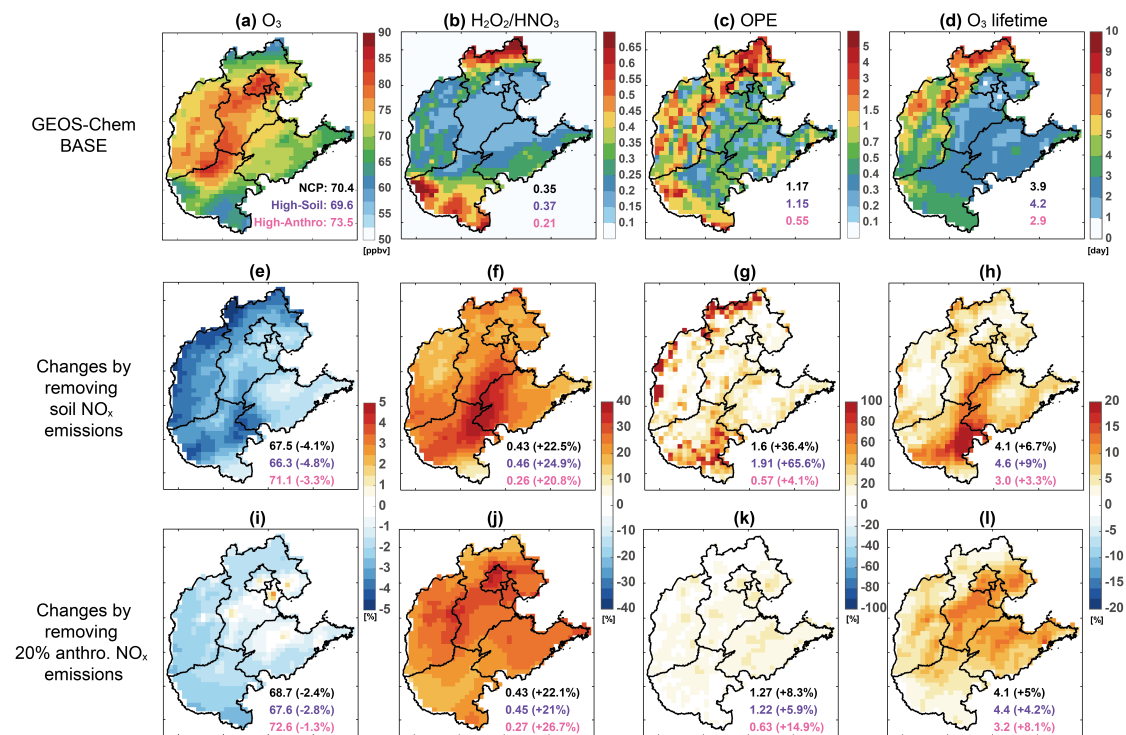

194

195

**Supplementary Figure 9. Different influences of anthropogenic and soil NO<sub>x</sub> emissions on ozone formation in the NCP.** Panels (a), (b), (c) (d) show the mean MDA8 ozone, H<sub>2</sub>O<sub>2</sub>/HNO<sub>3</sub> ratio, ozone production efficiency (OPE, mol mol<sup>-1</sup>, defined as ozone chemical production per NO<sub>x</sub> emitted), and ozone chemical lifetime over the NCP from the GEOS-Chem BASE simulation. The mean values over all the NCP grids (black), high soil emission grids (20% anthropogenic NO<sub>x</sub> emissions/soil NO<sub>x</sub> emissions < 0.5) (purple), and high anthropogenic emission grids (20% anthropogenic NO<sub>x</sub> emissions/soil NO<sub>x</sub> emissions > 2) (pink) are shown in the inset. Panels (e)-(h) are the same as panels (a)-(d), but show the relative changes if soil NO<sub>x</sub> emissions are excluded from the model. Panels (i)-(l) are the same as panels (a)-(d), but show the relative changes if 20% anthropogenic NO<sub>x</sub> emissions are excluded from the model. We use the emission ratio of 20% as the criteria here as the July soil NO<sub>x</sub> emissions in the NCP are about 20% of the anthropogenic NO<sub>x</sub> emissions (Figs 1a and 1b).

207

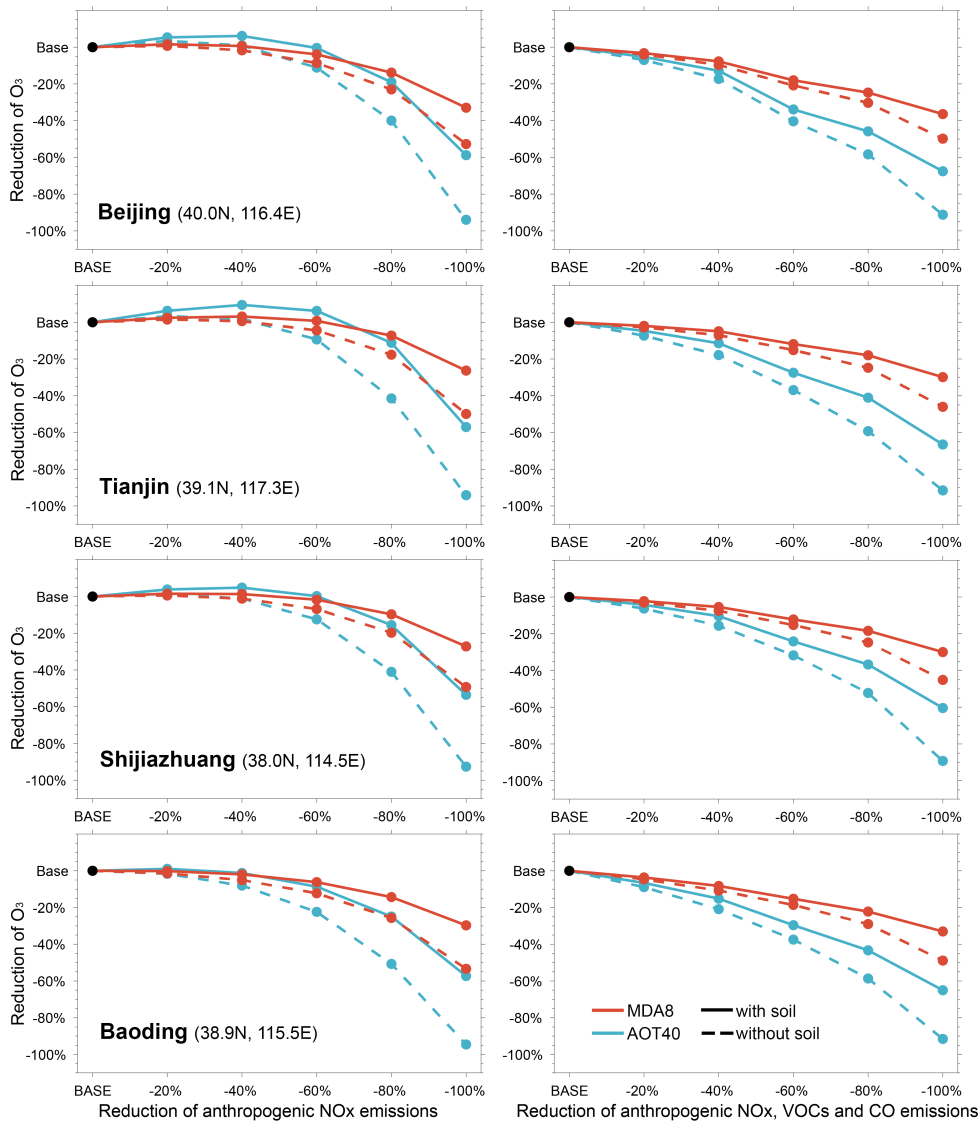

208  
 209  
 210  
 211  
 212  
 213  
 214  
 215

**Supplementary Figure 10. Responses of ozone MDA8 and AOT40 to the reductions of anthropogenic NO<sub>x</sub> emissions, and the joint reductions of anthropogenic NO<sub>x</sub>/VOCs/CO emissions.** Values are GEOS-Chem model simulated ozone changes at the centers of four NCP cities (Beijing, Tianjin, Shijiazhuang, and Baoding) in the presence (solid line) and absence (dashed line) of soil NO<sub>x</sub> emissions.

**Supplementary Table 1. Comparison of Soil NO<sub>x</sub> emission estimates in China.**

| Reference                         | Reference year | Above-canopy soil NO <sub>x</sub> emissions (Gg N a <sup>-1</sup> ) | Description                                                                                                                                                                                                                   |
|-----------------------------------|----------------|---------------------------------------------------------------------|-------------------------------------------------------------------------------------------------------------------------------------------------------------------------------------------------------------------------------|
| This study                        | 2017           | 770                                                                 | The Berkeley-Dalhousie Soil NO <sub>x</sub> Parameterization (BDSNP) mechanistic model as described in the text and in Hudman et al. (2012) <sup>1</sup>                                                                      |
| Wang et al. (2005) <sup>11</sup>  | 1999           | 657                                                                 | An empirical modeling approach of Yienger and Levy (1995) <sup>3</sup> (hereafter YL1995), with soil emissions parameterized by soil temperature and moisture.                                                                |
| Tie et al. (2006) <sup>12</sup>   | 2004           | 1375                                                                | Soil emissions parameterized with an exponential dependence on soil temperature.                                                                                                                                              |
| Yan et al. (2005) <sup>4</sup>    | /              | 480                                                                 | A statistical model of soil NO <sub>x</sub> emissions based on field measurements, considering the influences of soil organic carbon content, soil pH, land-cover type, climate condition, soil moisture, and nitrogen input. |
| Huang et al. (2014) <sup>13</sup> | /              | 1226<br>(95% Confidence Limit: 588 to 2132)                         | Upscaling the field measurements of soil NO <sub>x</sub> emissions at multiple sites to develop a national-scale inventory.                                                                                                   |
| Wang et al. (2007) <sup>14</sup>  | 1997–1999      | 850<br>(East China only)                                            | Using the YL1995 scheme in GEOS-Chem                                                                                                                                                                                          |
| Lin (2012) <sup>15</sup>          | 2006           | 380<br>(East China only)                                            | Top-down estimates using satellite NO <sub>2</sub> retrievals                                                                                                                                                                 |

219 **Supplementary Table 2. Comparison of above canopy soil NO<sub>x</sub> flux from the Berkeley-**  
 220 **Dalhousie Soil NO<sub>x</sub> Parameterization (BDSNP) implemented in GEOS-Chem with the**  
 221 **field measurements over China. Historical BDSNP soil NO<sub>x</sub> emissions are archived in**  
 222 **Weng et al. (2020).**

| Location            | Year            | Longitude | Latitude | Land type                  | Flux [kg N ha <sup>-1</sup> a <sup>-1</sup> ] |       | Reference                        |
|---------------------|-----------------|-----------|----------|----------------------------|-----------------------------------------------|-------|----------------------------------|
|                     |                 |           |          |                            | Observation                                   | BDSNP |                                  |
| 1 Beijing           | 2017            | 116.5E    | 39.8N    | Farmland                   | 4.8                                           | 4.6   | Wu et al. (2019) <sup>16</sup>   |
| 2 Shandong          | 2017            | 119.0E    | 37.8N    | Wetland                    | 0.9                                           | 0.2   | Wu et al. (2019) <sup>16</sup>   |
| 3 Shanxi            | 2007-2009       | 110.7E    | 34.5N    | Wheat–maize rotation field | 2.4                                           | 2.3   | Liu et al. (2011) <sup>17</sup>  |
| 4 Hubei             | 2017            | 110.7E    | 32.1N    | Farmland                   | 0.9                                           | 0.1   | Wu et al. (2019) <sup>16</sup>   |
| 5 Jiangsu, Wuxi     | 2002-2003       | 120.5E    | 31.6N    | Rice-wheat field           | 0.4                                           | 0.7   | Zhou et al. (2010) <sup>18</sup> |
| 6 Jiangsu, Changshu | 2005            | 120.7E    | 31.6N    | Farmland                   | 1.4                                           | 1.5   | Liu et al. (2006) <sup>19</sup>  |
| 7 Zhejiang          | March-June 2006 | 120.7E    | 30.8N    | Agricultural lands         | 1.7                                           | 0.6   | Fang and Mu (2007) <sup>20</sup> |
| 8 Guangdong         | 2005            | 112.5E    | 23.2N    | Pine forest                | 4.0                                           | 0.6   | Li et al. (2007) <sup>21</sup>   |
| 9 Hainan            | 2009-2010       | 109.5E    | 19.5N    | Orchard                    | 0.1                                           | 0.7   | Huo (2012) <sup>22</sup>         |

223

224 **Supplementary Table 3. GEOS-Chem model simulations conducted in this study.**

225

| Simulation           | Chinese Anthropogenic emissions |                   |        | Soil | Lightning |
|----------------------|---------------------------------|-------------------|--------|------|-----------|
|                      | NOx                             | VOCs/CO           | Others |      |           |
| BASE                 | 1 <sup>a</sup>                  | 1                 | 1      | 1    | 1         |
| NoSoil               | 1                               | 1                 | 1      | 0    | 1         |
| NoLight              | 1                               | 1                 | 1      | 1    | 0         |
| NoSoilLight          | 1                               | 1                 | 1      | 0    | 0         |
| NoAnthro             | 0                               | 0                 | 0      | 1    | 1         |
| NoAnthroSoil         | 0                               | 0                 | 0      | 0    | 1         |
| NoAnthroLight        | 0                               | 0                 | 0      | 1    | 0         |
| NoAnthroSoilLight    | 0                               | 0                 | 0      | 0    | 0         |
| Base_200%Soil        | 1                               | 1                 | 1      | 2    | 1         |
| NoAnthro_200%Soil    | 0                               | 0                 | 0      | 2    | 1         |
| 0%AnthroNOx_200%Soil | 0                               | 1                 | 1      | 2    | 1         |
| Base_50%Soil         | 1                               | 1                 | 1      | 0.5  | 1         |
| NoAnthro_50%Soil     | 0                               | 0                 | 0      | 0.5  | 1         |
| 0%AnthroNOx_50%Soil  | 0                               | 1                 | 1      | 0.5  | 1         |
| Base_redAnthroNOx    | 0/0.2/0.4/0.6/0.8               | 1                 | 1      | 1    | 1         |
| NoSoil_redAnthroNOx  | 0/0.2/0.4/0.6/0.8               | 1                 | 1      | 0    | 1         |
| Base_redAnthroALL    | 0/0.2/0.4/0.6/0.8               | 0/0.2/0.4/0.6/0.8 | 1      | 1    | 1         |
| NoSoil_redAnthroALL  | 0/0.2/0.4/0.6/0.8               | 0/0.2/0.4/0.6/0.8 | 1      | 0    | 1         |

226 <sup>a</sup>values represent the scaling ratios applied to the 2017 emission levels, i.e., the MEIC  
 227 anthropogenic emissions or soil/lightning emissions in the *BASE* simulation.

228

229

230 **Supplementary Table 4. Responses of GEOS-Chem simulated ozone metrics to reduction**  
 231 **of anthropogenic NO<sub>x</sub>, NMVOCs, and CO levels, in the presence vs. absence of soil NO<sub>x</sub>**  
 232 **emissions.**

| Reducing NO <sub>x</sub><br>emissions alone | With soil<br>emissions |       | Without soil<br>emissions |        | Jointly reducing<br>NO <sub>x</sub> , NMVOCs,<br>CO emissions |      | With soil<br>emissions |      | Without soil<br>emissions |  |
|---------------------------------------------|------------------------|-------|---------------------------|--------|---------------------------------------------------------------|------|------------------------|------|---------------------------|--|
|                                             | <b>MDA8 [ppbv]</b>     |       |                           |        |                                                               |      |                        |      |                           |  |
| 2017 level                                  | 72.4                   |       | 69.8                      |        | 2017 level                                                    | 72.4 |                        | 69.8 |                           |  |
| 20% Off                                     | 71.4                   | 1.4%  | 68.0                      | 2.6%   | 20% Off                                                       | 69.4 | 4.1%                   | 66.3 | 5.0%                      |  |
| 40% Off                                     | 69.4                   | 4.1%  | 64.9                      | 7.0%   | 40% Off                                                       | 65.9 | 9.0%                   | 61.8 | 11.5%                     |  |
| 60% Off                                     | 66.0                   | 8.8%  | 59.7                      | 14.5%  | 60% Off                                                       | 61.4 | 15.2%                  | 56.9 | 18.5%                     |  |
| 80% Off                                     | 60.0                   | 17.1% | 50.6                      | 27.5%  | 80% Off                                                       | 56.2 | 22.4%                  | 49.5 | 29.1%                     |  |
| 100% Off                                    | 49.4                   | 31.8% | 33.0                      | 52.7%  | 100% Off                                                      | 48.0 | 33.7%                  | 35.9 | 48.6%                     |  |
| <b>NDGT70 [day]</b>                         |                        |       |                           |        |                                                               |      |                        |      |                           |  |
| 2017 level                                  | 17.4                   |       | 15.3                      |        | 2017 level                                                    | 17.4 |                        | 15.3 |                           |  |
| 20% Off                                     | 16.6                   | 4.6%  | 13.5                      | 11.8%  | 20% Off                                                       | 14.8 | 14.9%                  | 12.1 | 20.9%                     |  |
| 40% Off                                     | 14.8                   | 14.9% | 10.8                      | 29.4%  | 40% Off                                                       | 11.6 | 33.3%                  | 8.2  | 46.4%                     |  |
| 60% Off                                     | 11.5                   | 33.9% | 6.5                       | 57.5%  | 60% Off                                                       | 7.9  | 54.6%                  | 4.0  | 73.9%                     |  |
| 80% Off                                     | 7.2                    | 58.6% | 0.5                       | 96.7%  | 80% Off                                                       | 3.8  | 78.2%                  | 0.2  | 98.7%                     |  |
| 100% Off                                    | 0.9                    | 94.8% | 0.0                       | 100.0% | 100% Off                                                      | 0.1  | 99.4%                  | 0.0  | 100.0%                    |  |
| <b>AOT40 [ppbv hour]</b>                    |                        |       |                           |        |                                                               |      |                        |      |                           |  |
| 2017 level                                  | 9453                   |       | 8733                      |        | 2017 level                                                    | 9453 |                        | 8733 |                           |  |
| 20% Off                                     | 9240                   | 2.3%  | 8256                      | 5.5%   | 20% Off                                                       | 8625 | 8.8%                   | 7705 | 11.8%                     |  |
| 40% Off                                     | 8736                   | 7.6%  | 7380                      | 15.5%  | 40% Off                                                       | 7610 | 19.5%                  | 6410 | 26.6%                     |  |
| 60% Off                                     | 7775                   | 17.8% | 5866                      | 32.8%  | 60% Off                                                       | 6301 | 33.3%                  | 4970 | 43.1%                     |  |
| 80% Off                                     | 6071                   | 35.8% | 3346                      | 61.7%  | 80% Off                                                       | 4806 | 49.2%                  | 2956 | 66.1%                     |  |
| 100% Off                                    | 3242                   | 65.7% | 475                       | 94.6%  | 100% Off                                                      | 2747 | 70.9%                  | 659  | 92.4%                     |  |

233

234

235 **Supplementary Table 5. Parameters of the logarithmic fitting function between the MDA8**  
 236 **ozone reduction (x, ppbv) and percentage reduction of anthropogenic emissions (y, %) as**  
 237 **listed in Supplementary Table 3.**

238

| Logarithmic fitting function: $y = a \times \log(x+b) + c$ |                                 |                                          |                                 |                                          |
|------------------------------------------------------------|---------------------------------|------------------------------------------|---------------------------------|------------------------------------------|
| Parameters                                                 | With soil emissions             |                                          | Without soil emissions          |                                          |
|                                                            | NO <sub>x</sub> reduction alone | Joint NO <sub>x</sub> -CO-VOCs reduction | NO <sub>x</sub> reduction alone | Joint NO <sub>x</sub> -CO-VOCs reduction |
| a                                                          | 34.06                           | 82.77                                    | 35.36                           | 62.72                                    |
| b                                                          | 1.32                            | 10.15                                    | 2.27                            | 8.16                                     |
| c                                                          | -8.99                           | -192.20                                  | -29.12                          | -132.70                                  |
| R <sup>2</sup>                                             | >0.99                           | >0.99                                    | >0.99                           | >0.99                                    |

239

240

241 **Supplementary Table 6. WRF-Chem model configuration options.**

242

| <b>Configuration</b>                     | <b>Schemes</b>                                                                                 |
|------------------------------------------|------------------------------------------------------------------------------------------------|
| Chemical initial and boundary conditions | CAM-Chem model (The Community Atmosphere Model with Chemistry) <sup>23</sup>                   |
| Cloud microphysics                       | Morrison scheme <sup>24</sup>                                                                  |
| Longwave radiation                       | RRTM scheme <sup>25</sup>                                                                      |
| Shortwave radiation                      | Goddard shortwave scheme <sup>26</sup>                                                         |
| Land surface model                       | Noah land surface scheme <sup>27</sup>                                                         |
| Planetary Boundary Layer                 | Yonsei University PBL scheme <sup>28</sup>                                                     |
| Gas phase chemistry                      | CBMZ scheme <sup>29</sup>                                                                      |
| Aerosol scheme                           | the model for simulating aerosol interactions and chemistry (MOSAIC) for aerosol <sup>30</sup> |

243

244



245 **Reference**

- 246 1. Hudman, R. C. *et al.* Steps towards a mechanistic model of global soil nitric oxide emissions:  
247 implementation and space based-constraints. *Atmos. Chem. Phys.* **12**, 7779-7795 (2012).
- 248 2. Steinkamp, J. & Lawrence, M. G. Improvement and evaluation of simulated global biogenic soil  
249 NO emissions in an AC-GCM. *Atmos. Chem. Phys.* **11**, 6063-6082 (2011).
- 250 3. Yienger, J. J., and Levy, H.: Empirical model of global soil-biogenic NO<sub>x</sub> emissions, *J. Geophys.*  
251 *Res.*, **100**, 11447-11464, <http://doi.org/10.1029/95jd00370>, 1995.
- 252 4. Yan, X., Ohara, T. & Akimoto, H. Statistical modeling of global soil NO<sub>x</sub>emissions. *Global*  
253 *Biogeochem. Cycles* **19** (2005).
- 254 5. Potter, P., Ramankutty, N., Bennett, E. M. & Donner, S. D. Characterizing the Spatial Patterns of  
255 Global Fertilizer Application and Manure Production. *Earth Interactions* **14**, 1-22 (2010).
- 256 6. Stehfest, E. & Bouwman, L. N<sub>2</sub>O and NO emission from agricultural fields and soils under natural  
257 vegetation: summarizing available measurement data and modeling of global annual emissions.  
258 *Nutrient Cycling in Agroecosystems* **74**, 207-228 (2006).
- 259 7. Wang, Y., Jacob, D. J. & Logan, J. A. Global simulation of tropospheric O<sub>3</sub>-NO<sub>x</sub>-hydrocarbon  
260 chemistry: 1. Model formulation. *J. Geophys. Res.* **103**, 10713-10725 (1998).
- 261 8. Wang, Q. *et al.* Data-driven estimates of global nitrous oxide emissions from croplands. *Natl. Sci.*  
262 *Rev* **7**, 441-452 (2020).
- 263 9. McDuffie, E. E. *et al.* A global anthropogenic emission inventory of atmospheric pollutants from  
264 sector- and fuel-specific sources (1970-2017): An application of the Community Emissions Data  
265 System (CEDS). *Earth Syst. Sci. Data* (2020).
- 266 10. Weng, H. *et al.* Global high-resolution emissions of soil NO<sub>x</sub>, sea salt aerosols, and biogenic volatile  
267 organic compounds. *Sci Data* **7**, 148 (2020).
- 268 11. Wang, Q., Han, Z. & Higano, Y. An inventory of nitric oxide emissions from soils in China. *Environ.*  
269 *Pollut.* **135**, 83-90 (2005).
- 270 12. Tie, X., Li, G., Ying, Z., Guenther, A. & Madronich, S. Biogenic emissions of isoprenoids and NO  
271 in China and comparison to anthropogenic emissions. *Sci. Total Environ.* **371**, 238-251 (2006).
- 272 13. Huang, Y. & Li, D. Soil nitric oxide emissions from terrestrial ecosystems in China: a synthesis of  
273 modeling and measurements. *Sci. Rep.* **4**, 7406 (2014).
- 274 14. Wang, Y. *et al.* Seasonal variability of NO<sub>x</sub>emissions over east China constrained by satellite  
275 observations: Implications for combustion and microbial sources. *J. Geophys. Res.* **112** (2007).
- 276 15. Lin, J. T. Satellite constraint for emissions of nitrogen oxides from anthropogenic, lightning and  
277 soil sources over East China on a high-resolution grid. *Atmos. Chem. Phys.* **12**, 2881-2898 (2012).
- 278 16. Wu, D. *et al.* Soil HONO emissions at high moisture content are driven by microbial nitrate  
279 reduction to nitrite: tackling the HONO puzzle. *ISME J* **13**, 1688-1699, (2019).
- 280 17. Liu, C. *et al.* Effects of irrigation, fertilization and crop straw management on nitrous oxide and  
281 nitric oxide emissions from a wheat–maize rotation field in northern China. *Agric., Ecosyst. Environ.*  
282 **140**, 226-233 (2011).
- 283 18. Zhou, Z. *et al.* Nitric oxide emissions from rice-wheat rotation fields in eastern China: effect of  
284 fertilization, soil water content, and crop residue. *Plant Soil* **336**, 87-98 (2010).
- 285 19. Liu, L., Yin, B., Han, C. Effect of different basal-dressing methods on NO emission from winter  
286 wheat field (in Chinese). *Journal of Anhui Agri. Sci.* **34**, 3762-3763 (2006).
- 287 20. Fang, S. & Mu, Y. NO<sub>x</sub> fluxes from three kinds of agricultural lands in the Yangtze Delta, China.

- 288        *Atmos. Environ.* **41**, 4766-4772.
- 289    21. Li, D., Wang, X., Mo, J., Sheng, G. & Fu, J. Soil nitric oxide emissions from two subtropical humid  
290        forests in south China. *J. Geophys. Res.* **112**, (2007).
- 291    22. Huo, M. Studies on the effects of type of N fertilizer on Carbon and Nitrogen fixation and  
292        allocation of Banana Plant and Emission of N<sub>2</sub>O, NO from soil planted Banana of II Plantation (in  
293        Chinese). Thesis for the master Degree in Agriculture, Hainan Univeristy, (2012)
- 294    23. Lamarque, J. F. *et al.* CAM-chem: description and evaluation of interactive atmospheric chemistry  
295        in the Community Earth System Model. *Geosci. Model Dev.* **5**, 369-411 (2012).
- 296    24. Morrison, H. & Pinto, J. O. Mesoscale Modeling of Springtime Arctic Mixed-Phase Stratiform  
297        Clouds Using a New Two-Moment Bulk Microphysics Scheme. *J Atmos Sci* **62**, 3683-3704 (2005).
- 298    25. Mlawer, E. J., Taubman, S. J., Brown, P. D., Iacono, M. J. & Clough, S. A. Radiative transfer for  
299        inhomogeneous atmospheres: RRTM, a validated correlated-k model for the longwave. *J. Geophys.*  
300        *Res.* **102**, 16663-16682 (1997).
- 301    26. Chou, M. D. & Suarez, M. J. An efficient thermal infrared radiation parameterization for use in  
302        general circulation models. NASA Technical Memorandum 104606, Vol. 3 (1994).
- 303    27. Chen, F. & Dudhia, J. Coupling an Advanced Land Surface-Hydrology Model with the Penn State-  
304        NCAR MM5 Modeling System. Part I: Model Implementation and Sensitivity. *Mon. Weather Rev.*  
305        **129**, 569-585 (2001).
- 306    28. Hong, S.-Y., Noh, Y. & Dudhia, J. A New Vertical Diffusion Package with an Explicit Treatment of  
307        Entrainment Processes. *Mon. Weather Rev.* **134**, 2318-2341 (2006).
- 308    29. Zaveri, R. A. & Peters, L. K. A new lumped structure photochemical mechanism for large-scale  
309        applications. *J. Geophys. Res.* **104**, 30387-30415 (1999).
- 310    30. Zaveri, R. A., Easter, R. C., Fast, J. D. & Peters, L. K. Model for Simulating Aerosol Interactions  
311        and Chemistry (MOSAIC). *J. Geophys. Res.* **113** (2008).
